# Supplementary material for: A new procedure to obtain ε-caprolactam catalyzed by a guanidinium salt
Source: Royal Society of Chemistry journal article supplement (doi:10.1039/c7nj03443a), 2017-01-01
Supplement: c7nj03443a1.pdf [file c7nj03443a1.pdf]

**Electronic Supplementary Information**

**Guanidinium salts as catalysers for  $\epsilon$ -caprolactam production**

V. Fernández-Stefanuto,<sup>a</sup> P. Verdía<sup>a</sup> and E. Tojo<sup>a\*</sup>

<sup>a</sup>Department of Organic Chemistry, Faculty of Chemistry, University of Vigo, 36210 Vigo, Spain

\*etojo@uvigo.es

**Table of Contents**

|                                                                                                     |    |
|-----------------------------------------------------------------------------------------------------|----|
| <b>Experimental</b> .....                                                                           | 2  |
| <b>Materials and methods</b> .....                                                                  | 2  |
| <b>Synthesis of 1-cyanoguanidinium <i>p</i>-toluenesulfonate [CNG][TsO]</b> .....                   | 3  |
| <b>Synthesis of 1-carbamoylguanidinium <i>p</i>-toluenesulfonate [NH<sub>2</sub>COG][TsO]</b> ..... | 5  |
| <b>Synthesis of 1-carbamoylguanidinium nitrate [NH<sub>2</sub>COG][NO<sub>3</sub>]</b> .....        | 7  |
| <b>Synthesis of <math>\epsilon</math>-caprolactam</b> .....                                         | 9  |
| <b>X-Ray data of [NH<sub>2</sub>COG][TsO]</b> .....                                                 | 11 |

## Experimental

### Materials and methods

The following reagents and solvents were purchased from commercial suppliers and employed without further purification: N-cyanoguanidine (Acros Organics, 99.5 %), *p*-toluenesulfonic acid monohydrate (Sigma Aldrich ACS reagent, 98.5 %), acetone (Sigma Aldrich ACS reagent, 99.5 %), nitric acid (Acros Organics, 65 %), cyclohexanone oxime (Acros Organics, 97 %).

The glass material employed in the synthetic reactions was dried in an oven at 60 °C during 24 h before its use. The evolution of the reactions was monitored by thin layer chromatography (t.l.c.) employing silica-gel sheets (Merck, TLC Silica gel 60 F<sub>254</sub>). For the synthesis of the salts, a mixture of MeOH:CH<sub>2</sub>Cl<sub>2</sub> = 1:9 was employed as eluent; for the synthesis of ε-caprolactam a mixture of AcOEt:Hex = 2:1 was employed as eluent; t.l.c. plates were visualized by exposure to U.V. (254 nm) and revealed by exposure to iodide (I<sub>2</sub>) or, in the case of ε-caprolactam, by treatment with a solution of a revealing agent (*p*-anisaldehyde) and subsequent heating.

Spectroscopic data were provided by the Center of Scientific-Technological Support to Research (CACTI) of the University of Vigo. <sup>1</sup>H and <sup>13</sup>C NMR spectra were recorded on a BRUKER ARX 400 spectrometer at 400.1621 (<sup>1</sup>H) and 100.6314 (<sup>13</sup>C) MHz, respectively. CDCl<sub>3</sub> (ACROS Organics, 99.6+ atom % D) and DMSO-d<sub>6</sub> (ACROS Organics, 99.5+ atom % D) were employed as deuterated solvents as received from the supplier. Chemical shifts are quoted in parts per million (ppm) relative to the signals corresponding to the residual non-deuterated solvents (CDCl<sub>3</sub>: δH = 7.26 ppm, δC = 77.16 ppm; DMSO-d<sub>6</sub>: δH = 2.50 ppm, δC = 39.52 ppm). Coupling constants are given in hertz (Hz). Mass spectra were recorded on a BRUKER FTMS APEXIII mass spectrometer. Elemental analysis were recorded on a Fisons Carlo Erba EA1108 elemental analyzer. The resolution of the structure of N-carbamoylguanidinium tosylate [NH<sub>2</sub>COG][TsO] by X-Ray diffraction, was achieved on a BRUKER APEXII CCD and a BRUKER SMART 6000 CD diffractometers. Melting points of the solids were recorded on a STUART CIENTIFIC MELTING POINT APPARATUS SMP3. The pH values of the salts in solution were recorded at 70 °C with a Crison PH-25 Crison Instruments pH meter employing standard solutions of known pH values of 4.01 (potassium hydrogen phthalate), 7.00 (Potassium dihydrogen phosphate/di-sodium hydrogen phosphate) and 9.21 (sodium tetraborate) for the calibration of the apparatus.

## Synthesis of 1-cyanoguanidinium *p*-toluenesulfonate [CNG][TsO]

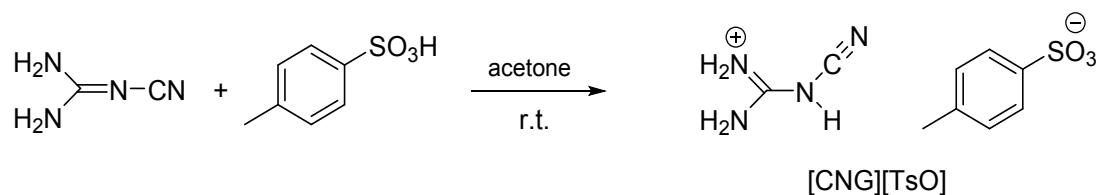

*P*-Toluenesulfonic acid monohydrated (1.00 g, 5.20 mmol) was dissolved in acetone (5 mL) and added over a suspension of N-cyanoguanidine (0.45 g, 5.2 mmol) in acetone (2 mL). The mixture was allowed to stir at r.t. during 4 h until the end of reaction, as indicated by t.l.c. (silica gel, MeOH:CH<sub>2</sub>Cl<sub>2</sub> = 1:9). The solid obtained was filtered, washed with acetone and dried under high vacuum (2 x 10<sup>-1</sup> Pa) to give [CNG][TsO] (1.30 g, 96%) as a white solid; mp 230-231 °C (from acetone); pH (70 °C): 1.86; <sup>1</sup>H RMN (400 MHz, DMSO-d<sub>6</sub>, referenced to DMSO-d<sub>6</sub>) δ: 7.5 (2 H, d, *J* 7.7 Hz, Ar(2)H, Ar(6)H), 7.1 (2 H, d, *J* 7.7 Hz, Ar(3)H, Ar(5)H), 6.6 (4 H, br s, NH<sub>2</sub>), 2.3 (3 H, s, CH<sub>3</sub>); <sup>13</sup>C RMN (100 MHz, DMSO-d<sub>6</sub>, referenced to DMSO-d<sub>6</sub>) δ: 163.2, 145.2, 138.6, 128.7, 125.9, 118.7, 21.2; MS-ESI *m/z* (%): 341 ((C<sub>2</sub>H<sub>5</sub>N<sub>4</sub>)<sub>2</sub>(C<sub>7</sub>H<sub>7</sub>SO<sub>3</sub>)<sup>+</sup>, 100%) ([A<sub>2</sub>B]<sup>+</sup>), 597 ((C<sub>2</sub>H<sub>5</sub>N<sub>4</sub>)<sub>3</sub>(C<sub>7</sub>H<sub>7</sub>SO<sub>3</sub>)<sub>2</sub>)<sup>+</sup>, 73 ([A<sub>3</sub>B<sub>2</sub>]<sup>+</sup>), 853 ((C<sub>2</sub>H<sub>5</sub>N<sub>4</sub>)<sub>5</sub>(C<sub>7</sub>H<sub>7</sub>SO<sub>3</sub>)<sub>3</sub>)<sup>+</sup>, 12 ([A<sub>4</sub>B<sub>3</sub>]<sup>+</sup>); Elemental Analysis (Found: C, 41.9; H, 5.0; N, 21.7; S, 12.4. C<sub>9</sub>H<sub>12</sub>N<sub>4</sub>O<sub>3</sub>S requires C, 42.2; H, 4.7; N, 21.9; S, 12.5%).

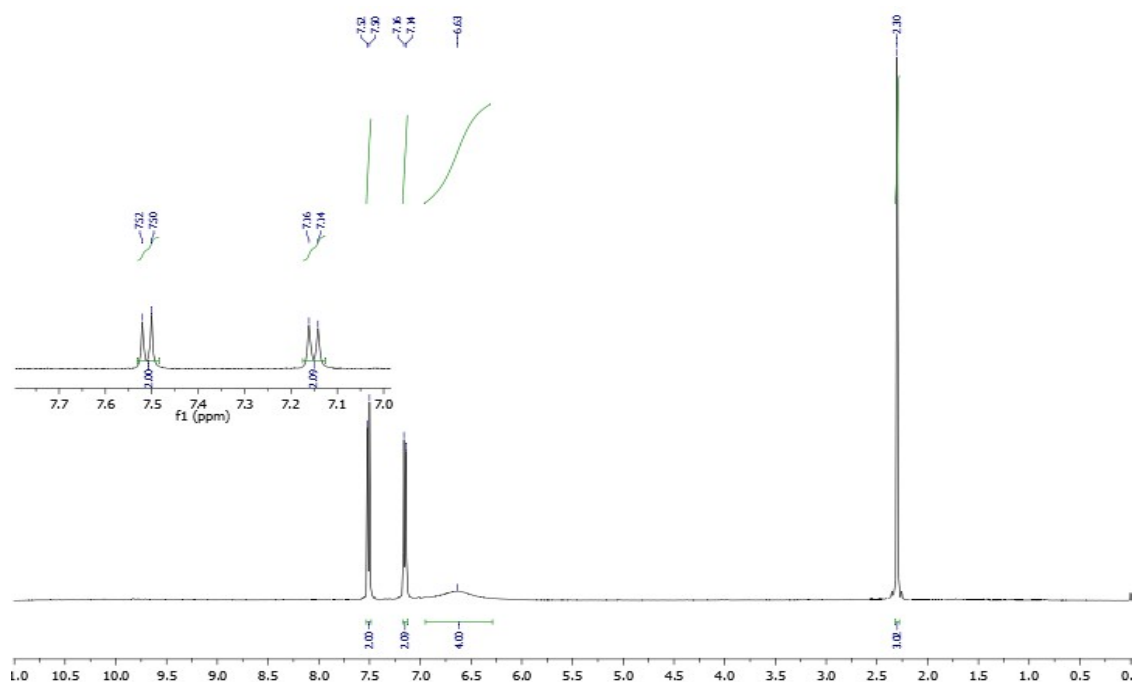

Fig S1. <sup>1</sup>H RMN spectrum of [CNG][TsO].

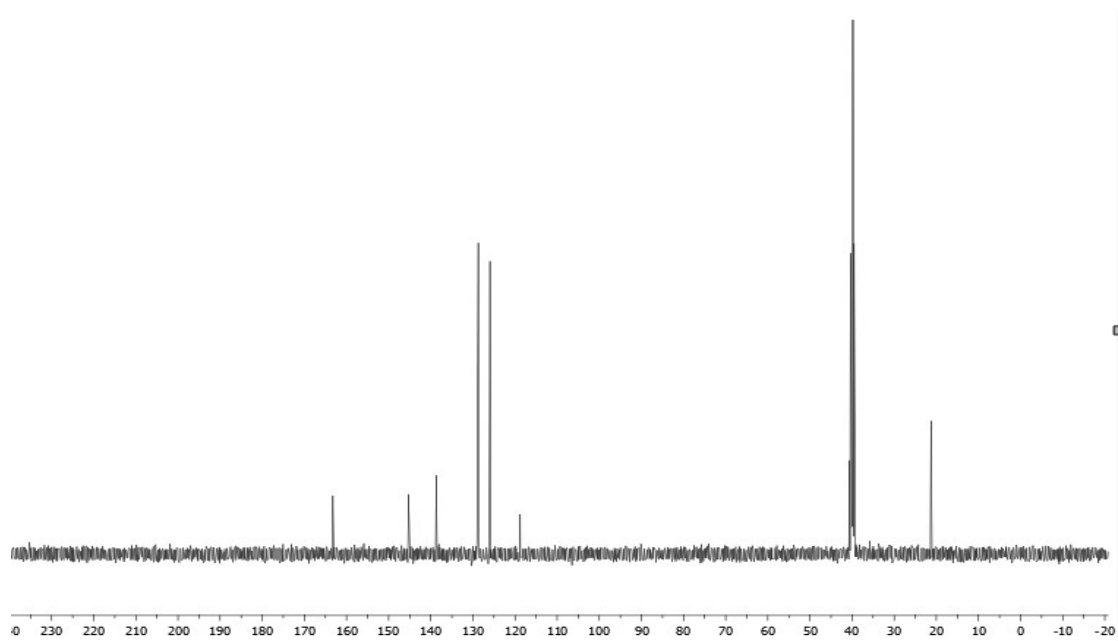

**Fig S2.**  $^{13}\text{C}$  RMN spectrum of [CNG][TsO].

### Mass Spectrum List Report

Analysis Info                      Electrospray (ESI)  
Analysis Name                    ETVT1606071\_1597.18                      Acquisition Date                    5/10/2016 1:09:51 PM  
Sample Name                      CNGTOS                                              Instrument                                apex-Qe

Acquisition Parameter  
Capillary Exit                    300.0 V                                              Skimmer 1                                20.0 V

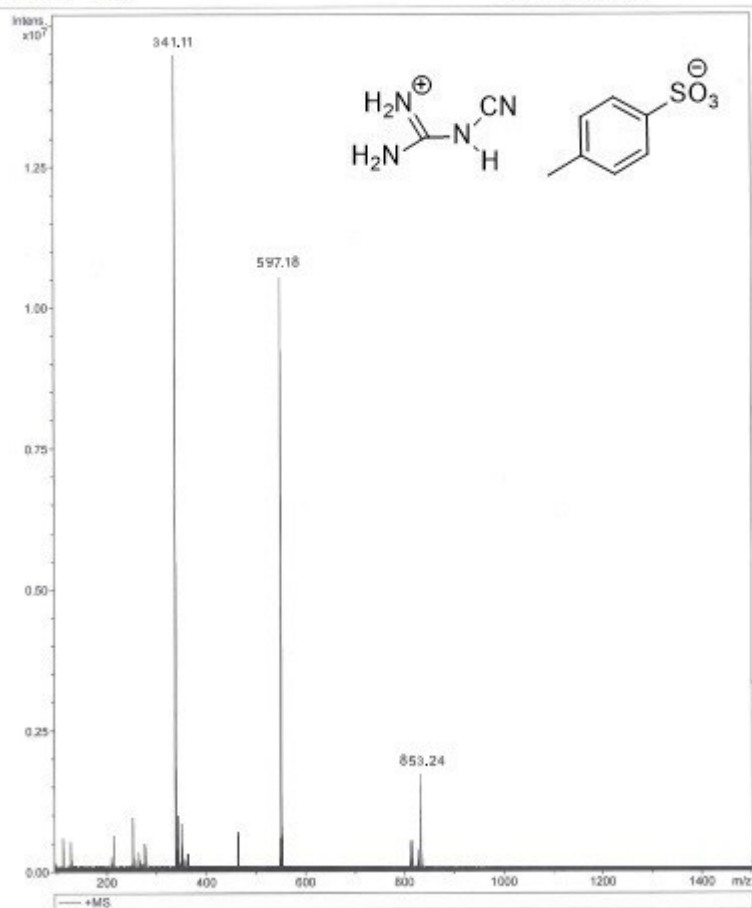

U. Vigo/CACTI/DEyPIAPEX-Qe

Page 1 of 5

**Fig S3.** Mass spectrum of [CNG][TsO].

### Synthesis of 1-carbamoylguanidinium-*p*-toluensulfonate [NH<sub>2</sub>COG][TsO]

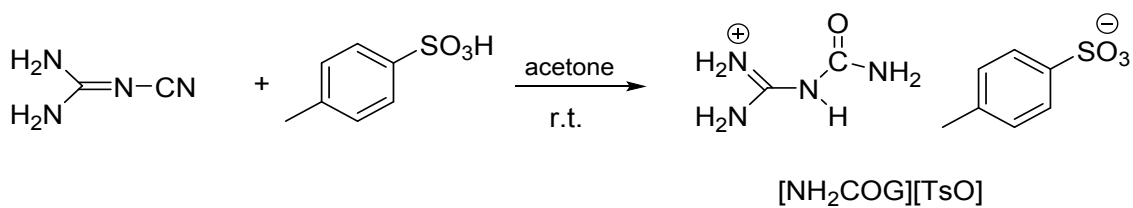

*P*-Toluensulfonic acid monohydrated (1.00 g, 5.20 mmol) was dissolved in acetone (5 mL) and added over a suspension of *N*-cyanoguanidine (0.45 g, 5.2 mmol) in acetone (2 mL). The mixture was allowed to stir at r.t. during 12 h until the end of reaction, as indicated by t.l.c. (silica gel, MeOH:CH<sub>2</sub>Cl<sub>2</sub> = 1:9). The solid obtained was filtered, recrystallized in H<sub>2</sub>O and dried under high vacuum (2 x 10<sup>-1</sup> Pa) to give [NH<sub>2</sub>COG][TsO] (1.25 g, 93%) as colourless crystals; mp 178-80 °C (from H<sub>2</sub>O); <sup>1</sup>H RMN (400 MHz, DMSO-d<sub>6</sub>, referenced to DMSO-d<sub>6</sub>) δ: 9.7 (1 H, s, NH), 8.0 (4 H, br s, C(NH<sub>2</sub>)<sub>2</sub>), 7.2 (2 H, s, NH<sub>2</sub>C=O), 7.5 (2 H, d, *J* 7.7 Hz, Ar(2)H, Ar(6)H), 7.1 (2 H, d, *J* 7.7 Hz, Ar(3)H, Ar(5)H), 2.3 (3 H, s, CH<sub>3</sub>); <sup>13</sup>C RMN (100 MHz, DMSO-d<sub>6</sub>, referenced to DMSO-d<sub>6</sub>) δ: 155.8, 154.8, 144.7, 139.0, 128.8, 125.9, 21.2; MS-ESI *m/z* (%): 377 ([C<sub>2</sub>H<sub>7</sub>N<sub>4</sub>O)<sub>2</sub>(C<sub>7</sub>H<sub>7</sub>SO<sub>3</sub>)<sup>+</sup>, 100%) ([A<sub>2</sub>B]<sup>+</sup>), 651([C<sub>2</sub>H<sub>7</sub>N<sub>4</sub>O)<sub>3</sub>(C<sub>7</sub>H<sub>7</sub>SO<sub>3</sub>)<sub>2</sub>)<sup>+</sup>, 62) ([A<sub>3</sub>B<sub>2</sub>]<sup>+</sup>), 925 ([C<sub>2</sub>H<sub>7</sub>N<sub>4</sub>O)<sub>5</sub>(C<sub>7</sub>H<sub>7</sub>SO<sub>3</sub>)<sub>3</sub>)<sup>+</sup>, 32) ([A<sub>4</sub>B<sub>3</sub>]<sup>+</sup>); Elemental Analysis (Found: C, 40.8; H, 5.1; N, 20.2; S, 10.95. C<sub>9</sub>H<sub>14</sub>N<sub>4</sub>O<sub>4</sub>S requires C, 40.9; H, 5.1; N, 20.1; S, 10.85%).

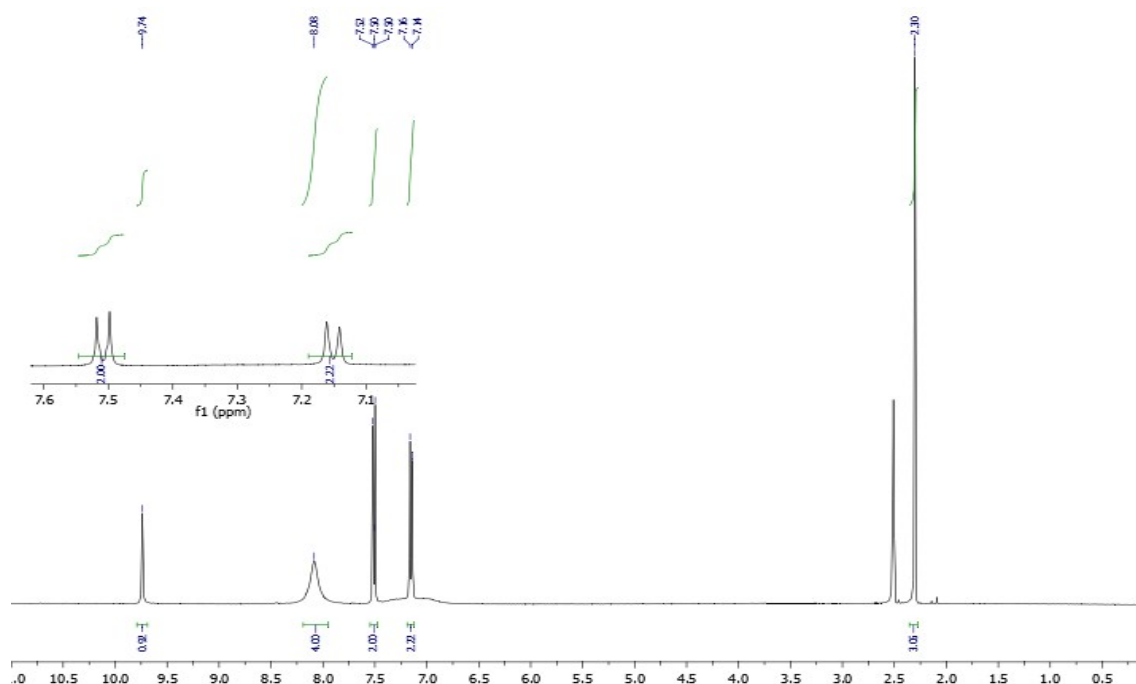

**Fig S4.** <sup>1</sup>H RMN spectrum of [NH<sub>2</sub>COG][TsO].

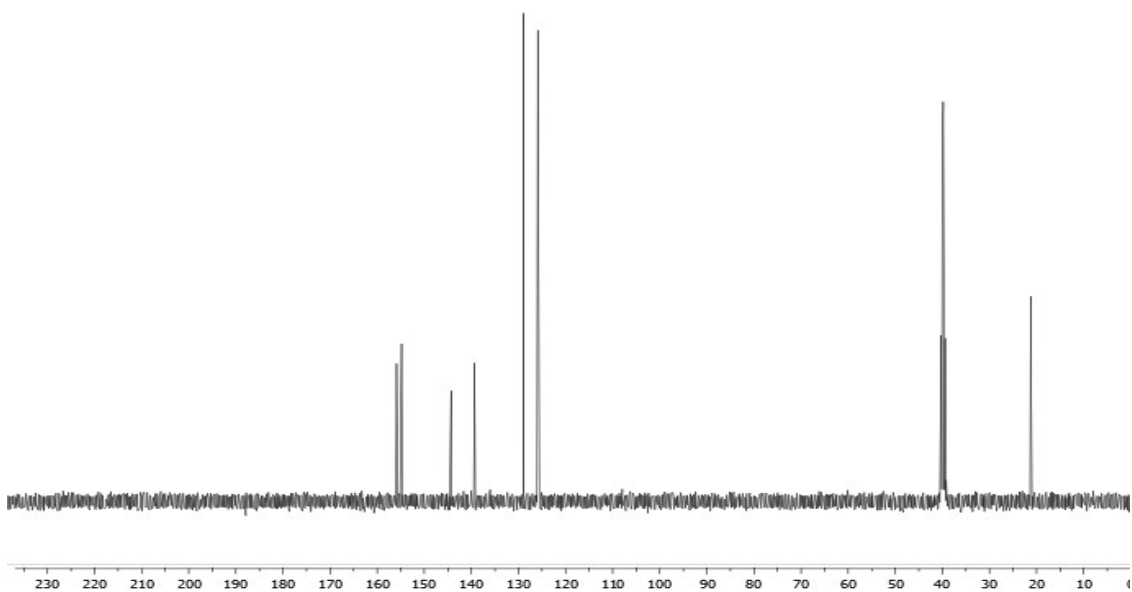

**Fig S5.**  $^{13}\text{C}$  RMN spectrum of  $[\text{NH}_2\text{COG}][\text{Tso}]$ .

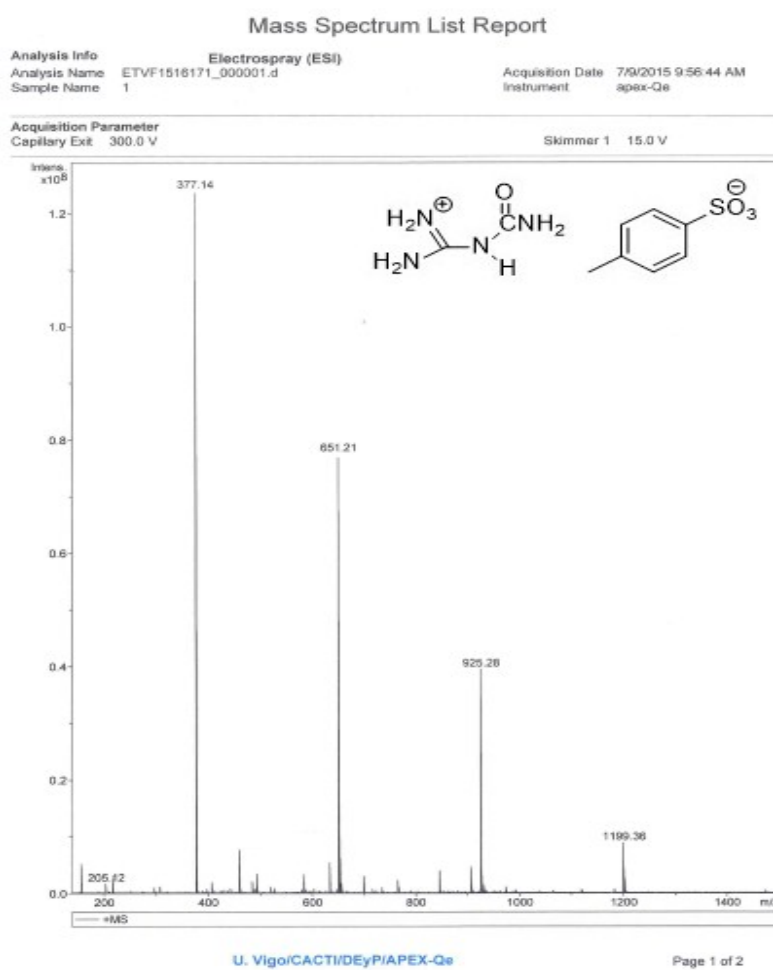

**Fig S6.** Mass spectrum of  $[\text{NH}_2\text{COG}][\text{Tso}]$ .

## Synthesis of 1-carbamoylguanidinium nitrate [NH<sub>2</sub>COG][NO<sub>3</sub>]

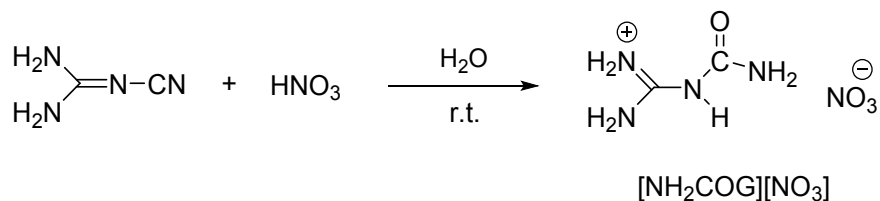

Nitric acid (65%, 0.50 mL) was added dropwise over a solution of N-cyanoguanidine (0.50 g, 5.90 mmol) in H<sub>2</sub>O (5 mL). The mixture was allowed to stir at r.t. for 15 min, and then it was boiled at 100 °C during 3 min. It was allowed to cool down to r.t. and a white precipitate was obtained; it was filtered, washed with H<sub>2</sub>O and dried under high vacuum (2 x 10<sup>-1</sup> Pa) giving [NH<sub>2</sub>COG][NO<sub>3</sub>] (1.00 g, 94%) as a white solid ; mp 202-203 °C (from H<sub>2</sub>O) (lit.,<sup>1</sup> 200 °C); <sup>1</sup>H RMN (400 MHz, DMSO-d<sub>6</sub>, referenced to DMSO-d<sub>6</sub>) δ: 9.7 (1 H, s, NH), 8.0 (4 H, s, C(NH<sub>2</sub>)<sub>2</sub>), 7.1 (2 H, s, NH<sub>2</sub>C=O); <sup>13</sup>C RMN (100 MHz, DMSO-d<sub>6</sub>, referenced to DMSO-d<sub>6</sub>) δ: 155.8, 154.8.

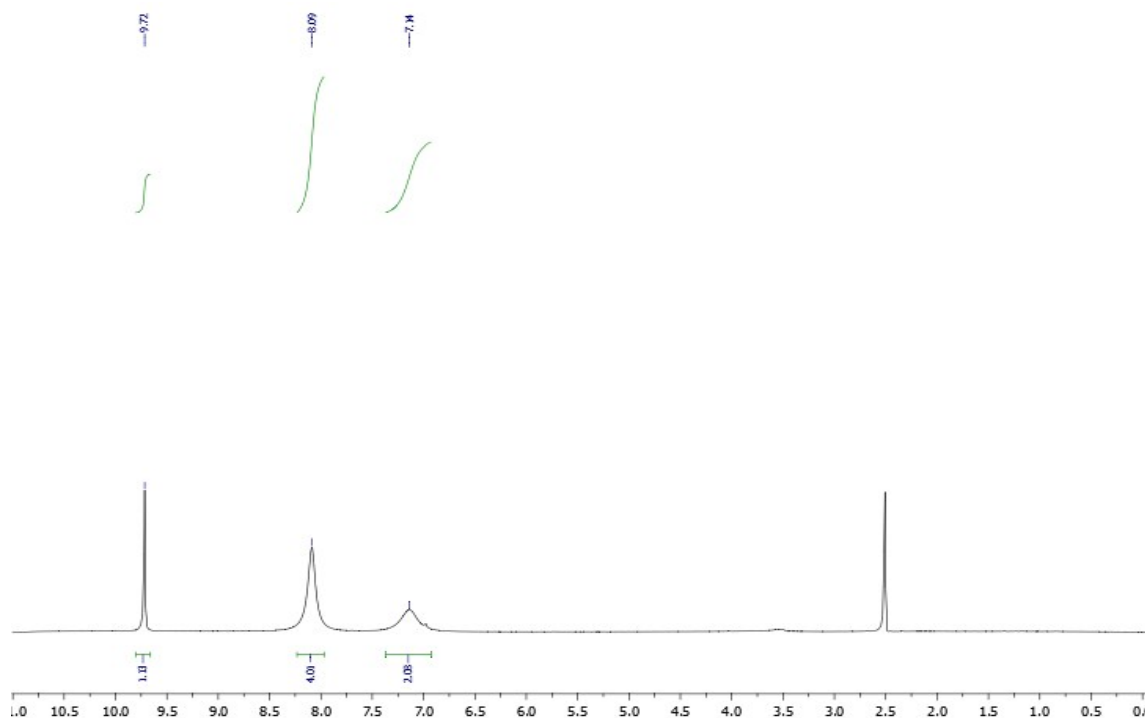

**Fig S7.** <sup>1</sup>H RMN spectrum of [NH<sub>2</sub>COG][NO<sub>3</sub>].



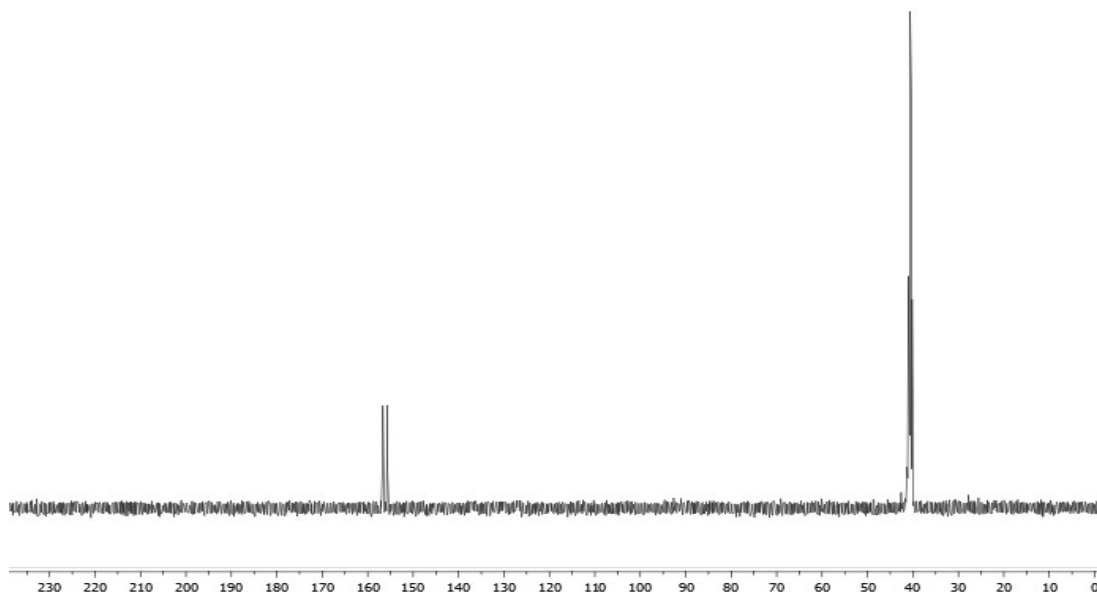

**Fig S8.**  $^{13}\text{C}$  RMN spectrum of  $[\text{NH}_2\text{COG}][\text{NO}_3]$ .

### Synthesis of $\epsilon$ -caprolactam

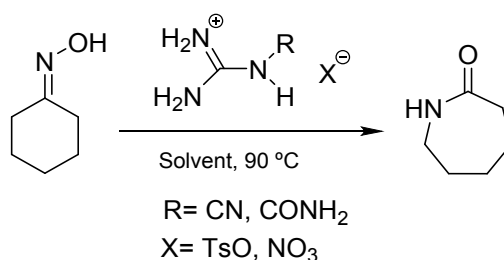

A solution of the cyclohexanone oxime (1.00 g, 8.80 mmol) in 25 mL of the selected solvent ( $\text{H}_2\text{O}$ , MeOH or DMF) was added over a suspension of the corresponding guanidinium salt (1-2 eq.) in 20 mL of the same solvent (Table 1). The mixture was heated at a temperature ranging from 60 °C to 90 °C and allowed to stir until the end of reaction, as indicated by t.l.c. (silica gel, AcOEt:Hex = 2:1). The solvent was then removed by heating under reduced pressure and the resulting crude reaction product was worked up by one of the following methods:

a)  $\text{CH}_2\text{Cl}_2$  (20 mL) was added to the crude reaction product and the mixture was kept at -20 °C during 10 h. A precipitate was formed and separated by filtration under vacuum. The solvent was removed by heating under reduced pressure.  $\text{H}_2\text{O}$  (25 mL) was added and  $\epsilon$ -caprolactam was extracted with  $\text{CH}_2\text{Cl}_2$  (4 x 20 mL).  $\text{CH}_2\text{Cl}_2$  was removed by heating under reduced pressure and  $\epsilon$ -caprolactam (0.597 g, 60 %) was isolated with high purity (99%).

b) As an alternative method,  $\epsilon$ -caprolactam was isolated by sublimation from the mixture with the guanidinium salt. The mixture of  $\epsilon$ -caprolactam and guanidinium salt was heated at 120 °C under reduced pressure ( $2 \times 10^{-1}$  Pa), employing a cold finger kept cool with a stream of water at 20 °C to allow the deposition of the sublimate. Crystals of pure  $\epsilon$ -caprolactam (0.984 g, 99 %) were collected.

Data: mp 69.5-71 °C (from hexane) (lit.,<sup>2</sup> 72 °C);  $^1\text{H}$  RMN (400 MHz, DMSO- $d_6$ , referenced to DMSO- $d_6$ )  $\delta$ : 6.0 (1 H, s, NH), 3.2 (2 H, dd,  $J_1$  5.7 Hz,  $J_2$  9.6 Hz, C(3)H), 2.4 (2 H, m, C(7)H), 1.77\* (2 H, m, C(6)H), 1.72\* (2 H, m, C(4)H), 1.68 (2 H, m, C(5)H);  $^{13}\text{C}$  RMN (100 MHz, DMSO- $d_6$ , referenced to DMSO- $d_6$ )  $\delta$ : 179.3, 42.8, 36.7, 30.6, 29.7, 23.2.

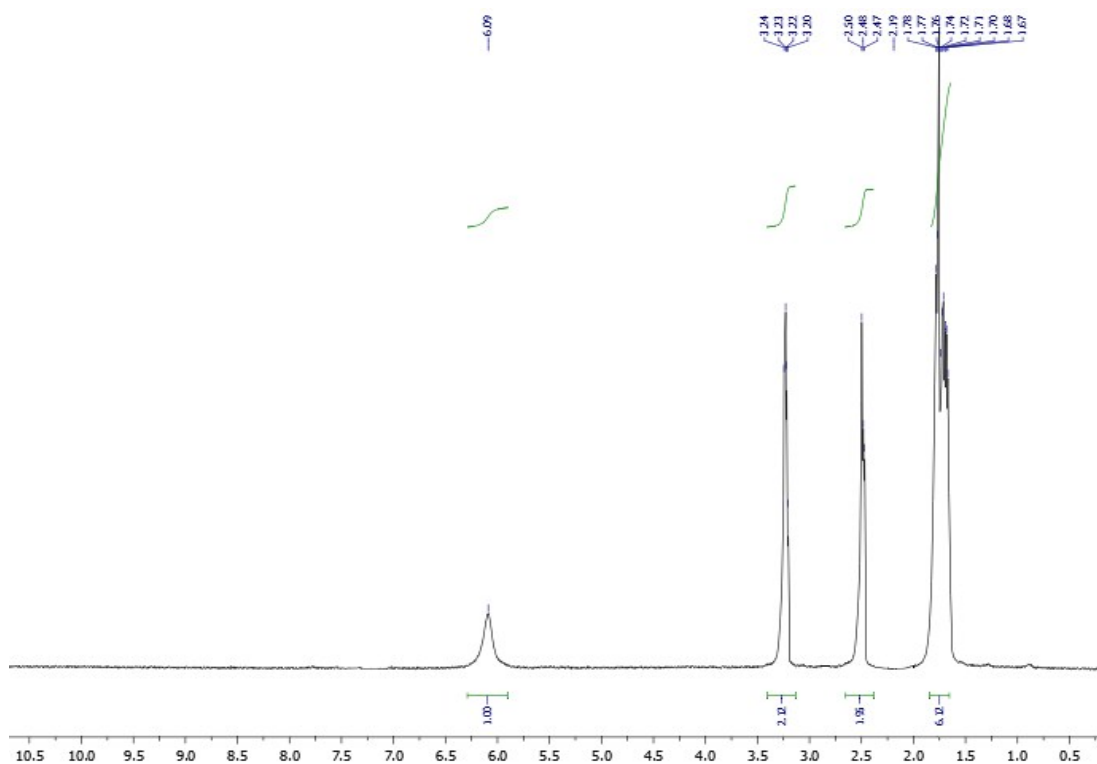

**Fig S9.**  $^1\text{H}$  RMN spectrum of  $\epsilon$ -caprolactam.

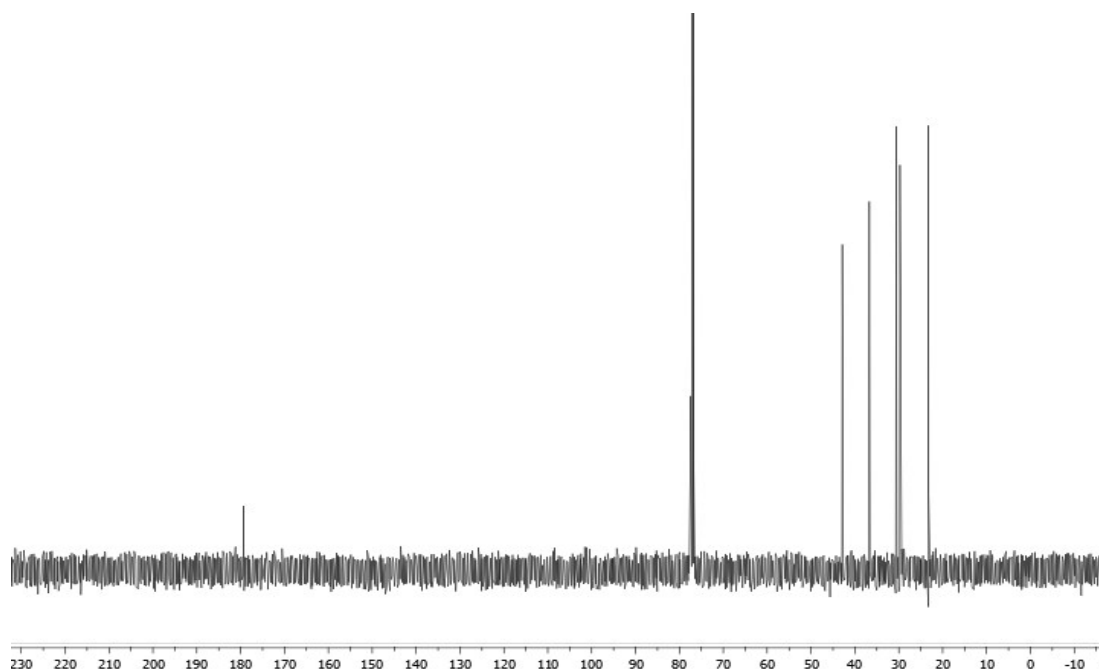

**Fig S10.**  $^{13}\text{C}$  RMN spectrum of  $\epsilon$ -caprolactam.

### X-Ray data of 1-carbamoylguanidinium *p*-toluensulfonate ( $[\text{NH}_2\text{COG}][\text{TsO}]$ )

**Table S1.** Crystal data and structure refinement for 1-carbamoylguanidinium *p*-toluensulfonate  $[\text{NH}_2\text{COG}][\text{TsO}]$

|                                 |                                                                |                               |
|---------------------------------|----------------------------------------------------------------|-------------------------------|
| Empirical formula               | $\text{C}_9 \text{H}_{14} \text{N}_4 \text{O}_4 \text{S}$      |                               |
| Formula weight                  | 274.30                                                         |                               |
| Temperature                     | 296(2) K                                                       |                               |
| Wavelength                      | 1.54178 Å                                                      |                               |
| Crystal system                  | Triclinic                                                      |                               |
| Space group                     | P-1                                                            |                               |
| Unit cell dimensions            | $a = 6.6195(13)$ Å                                             | $\alpha = 96.15(3)^\circ$ .   |
|                                 | $b = 8.2505(19)$ Å                                             | $\beta = 99.794(18)^\circ$ .  |
|                                 | $c = 12.924(5)$ Å                                              | $\gamma = 97.771(14)^\circ$ . |
| Volume                          | $683.0(3)$ Å <sup>3</sup>                                      |                               |
| Z                               | 2                                                              |                               |
| Density (calculated)            | 1.334 Mg/m <sup>3</sup>                                        |                               |
| Absorption coefficient          | 2.254 mm <sup>-1</sup>                                         |                               |
| F(000)                          | 288                                                            |                               |
| Crystal size                    | 0.124 x 0.109 x 0.031 mm <sup>3</sup>                          |                               |
| Theta range for data collection | 3.502 to 68.189°.                                              |                               |
| Index ranges                    | $-7 \leq h \leq 7$ , $-9 \leq k \leq 9$ , $-15 \leq l \leq 15$ |                               |
| Reflections collected           | 14099                                                          |                               |
| Independent reflections         | 2439 [R(int) = 0.0578]                                         |                               |

|                                   |                                             |
|-----------------------------------|---------------------------------------------|
| Completeness to theta = 67.679°   | 98.0 %                                      |
| Absorption correction             | Semi-empirical from equivalents             |
| Max. and min. transmission        | 0.7530 and 0.5733                           |
| Refinement method                 | Full-matrix least-squares on F <sup>2</sup> |
| Data / restraints / parameters    | 2439 / 7 / 179                              |
| Goodness-of-fit on F <sup>2</sup> | 1.069                                       |
| Final R indices [I>2sigma(I)]     | R1 = 0.0573, wR2 = 0.1658                   |
| R indices (alldata)               | R1 = 0.0680, wR2 = 0.1763                   |
| Extinction coefficient            | n/a                                         |
| Largest diff. peak and hole       | 0.388 and -0.170 e.Å <sup>-3</sup>          |

**Table S2.** Bond lengths [Å] and angles [°] for 1-carbamoylguanidinium *p*-toluenesulfonate ([NH<sub>2</sub>COG][TsO]).

---

|                |          |
|----------------|----------|
| C(1)-O(1)      | 1.216(3) |
| C(1)-N(1)      | 1.322(4) |
| C(1)-N(2)      | 1.396(3) |
| C(2)-N(3)      | 1.304(3) |
| C(2)-N(4)      | 1.315(4) |
| C(2)-N(2)      | 1.347(3) |
| S(1)-O(4)      | 1.426(2) |
| S(1)-O(3)      | 1.443(2) |
| S(1)-O(2)      | 1.452(2) |
| S(1)-C(3)      | 1.749(3) |
| C(4)-C(3)      | 1.3900   |
| C(4)-C(5)      | 1.3900   |
| C(3)-C(4')     | 1.3900   |
| C(4')-C(5')    | 1.3900   |
| C(5')-C(6)     | 1.3900   |
| C(6)-C(5)      | 1.3900   |
| C(6)-C(7)      | 1.533(8) |
| O(1)-C(1)-N(1) | 124.4(3) |
| O(1)-C(1)-N(2) | 121.7(2) |
| N(1)-C(1)-N(2) | 113.9(2) |
| N(3)-C(2)-N(4) | 120.9(2) |
| N(3)-C(2)-N(2) | 121.6(2) |
| N(4)-C(2)-N(2) | 117.5(2) |

|                  |            |
|------------------|------------|
| C(2)-N(2)-C(1)   | 125.4(2)   |
| O(4)-S(1)-O(3)   | 112.31(15) |
| O(4)-S(1)-O(2)   | 113.64(15) |
| O(3)-S(1)-O(2)   | 111.23(14) |
| O(4)-S(1)-C(3)   | 106.22(15) |
| O(3)-S(1)-C(3)   | 107.06(18) |
| O(2)-S(1)-C(3)   | 105.80(14) |
| C(3)-C(4)-C(5)   | 120.0      |
| C(4)-C(3)-C(4')  | 120.0      |
| C(4)-C(3)-S(1)   | 120.0(2)   |
| C(4')-C(3)-S(1)  | 119.9(2)   |
| C(5')-C(4')-C(3) | 120.0      |
| C(6)-C(5')-C(4') | 120.0      |
| C(5)-C(6)-C(5')  | 120.0      |
| C(5)-C(6)-C(7)   | 118.4(8)   |
| C(5')-C(6)-C(7)  | 121.6(8)   |
| C(6)-C(5)-C(4)   | 120.0      |

**Table S3.** Hydrogen bonds for 1-carbamoylguanidinium *p*-toluensulfonate ([NH<sub>2</sub>COG][TsO]) [Å and °].

| D-H...A             | d(D-H)    | d(H...A)  | d(D...A) | <(DHA) |
|---------------------|-----------|-----------|----------|--------|
| N(3)-H(3A)...O(3)#1 | 0.865(19) | 2.09(2)   | 2.912(3) | 157(3) |
| N(1)-H(1A)...O(2)#2 | 0.840(18) | 2.18(2)   | 3.005(4) | 165(3) |
| N(2)-H(2)...O(2)    | 0.862(18) | 2.008(18) | 2.867(3) | 173(3) |
| N(1)-H(1B)...O(3)   | 0.855(19) | 2.04(2)   | 2.875(4) | 165(3) |
| N(3)-H(3B)...O(1)   | 0.855(18) | 2.00(3)   | 2.638(3) | 131(3) |
| N(3)-H(3B)...O(4)#3 | 0.855(18) | 2.47(3)   | 3.072(3) | 128(3) |
| N(4)-H(4A)...O(4)#1 | 0.849(18) | 2.30(2)   | 3.104(4) | 159(3) |
| N(4)-H(4A)...O(3)#1 | 0.849(18) | 2.62(3)   | 3.263(4) | 134(3) |
| N(4)-H(4B)...O(1)#4 | 0.860(18) | 2.10(3)   | 2.735(3) | 130(3) |

Symmetry transformations used to generate equivalent atoms:

#1  $x,y+1,z$  #2  $x+1,y,z$  #3  $x+1,y+1,z$  #4  $x-1,y,z$
